# Supplementary material
Source: ML conference proceedings conference paper supplement (https://openreview.net/forum?id=DqldYcJB7A)
Supplement: supplementary_material [file attachment]

|   |   |   |   |   |   |
|---|---|---|---|---|---|
| 1 | 1 | 1 | 0 | 0 | 3 |
| 1 | 2 | 2 | 2 | 0 | 3 |
| 1 | 2 | 2 | 2 | 3 | 3 |
| 0 | 4 | 0 | 0 | 3 | 4 |
| 0 | 4 | 0 | 4 | 4 | 4 |
| 0 | 4 | 4 | 4 | 4 | 4 |

pseudo labels

|   |   |   |   |   |   |
|---|---|---|---|---|---|
| 1 | 1 | 1 | 0 | 0 | 3 |
| 1 | 0 | 1 | 0 | 0 | 3 |
| 1 | 0 | 0 | 0 | 3 | 3 |
| 0 | 0 | 5 | 5 | 3 | 0 |
| 0 | 0 | 5 | 5 | 3 | 0 |
| 0 | 0 | 0 | 0 | 0 | 0 |

real labels

filling

|   |   |   |   |   |   |
|---|---|---|---|---|---|
| 1 | 1 | 1 | 0 | 0 | 3 |
| 1 | 2 | 1 | 2 | 0 | 3 |
| 1 | 2 | 2 | 2 | 3 | 3 |
| 0 | 4 | 5 | 5 | 3 | 4 |
| 0 | 4 | 5 | 5 | 3 | 4 |
| 0 | 4 | 4 | 4 | 4 | 4 |

final labels
