# Supplementary material
Source: ML conference proceedings conference paper supplement (https://openreview.net/forum?id=DqldYcJB7A)

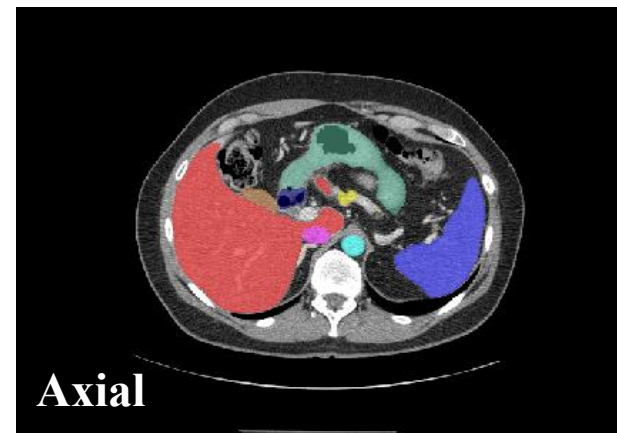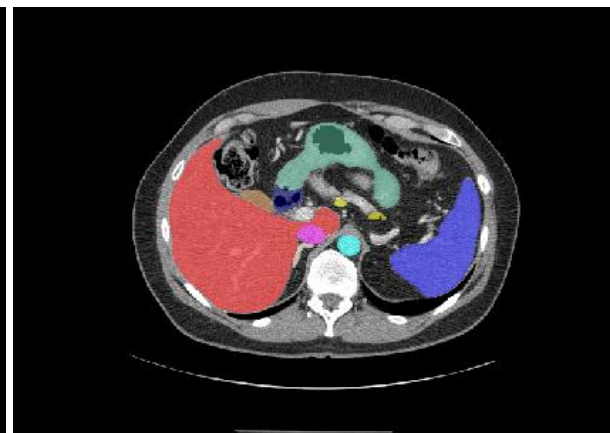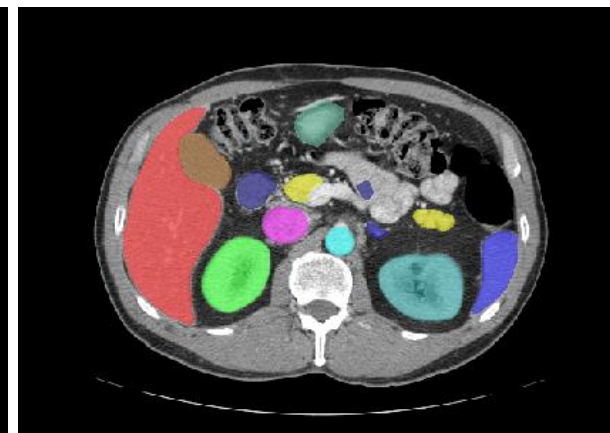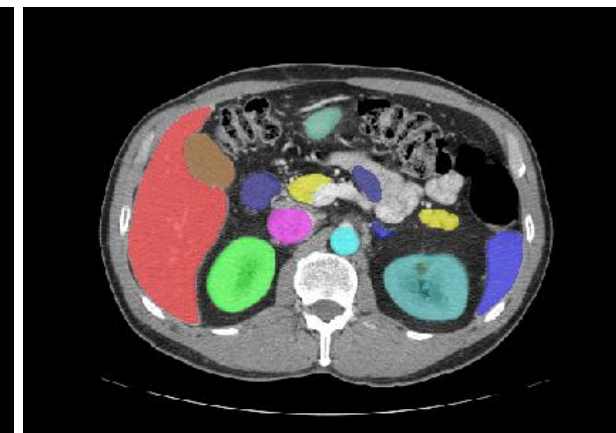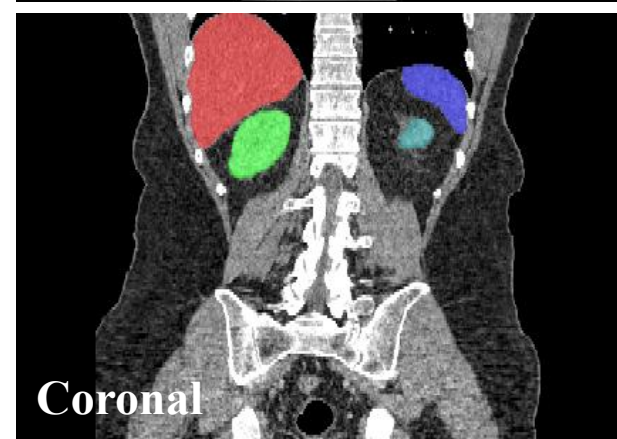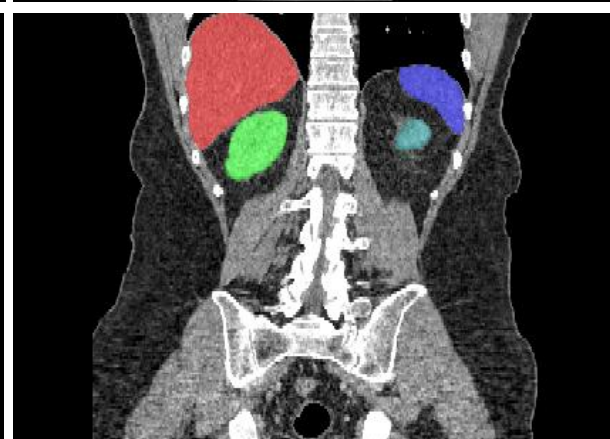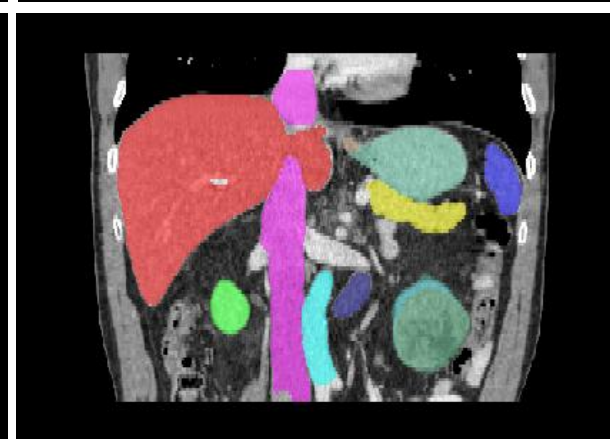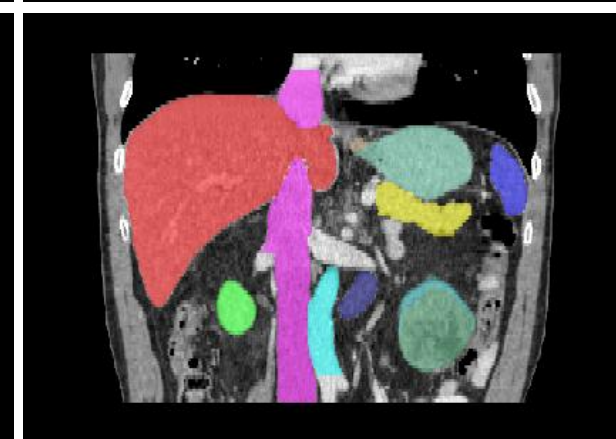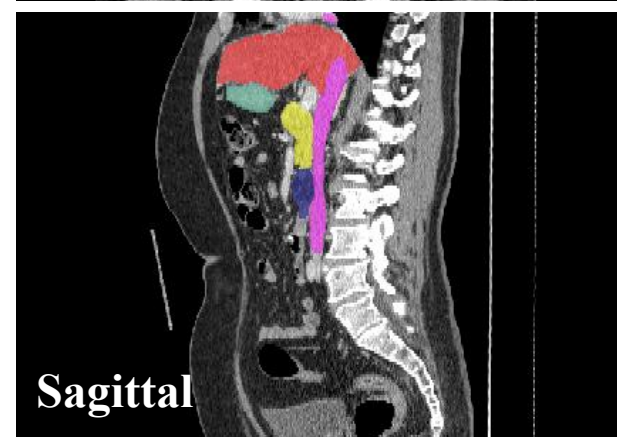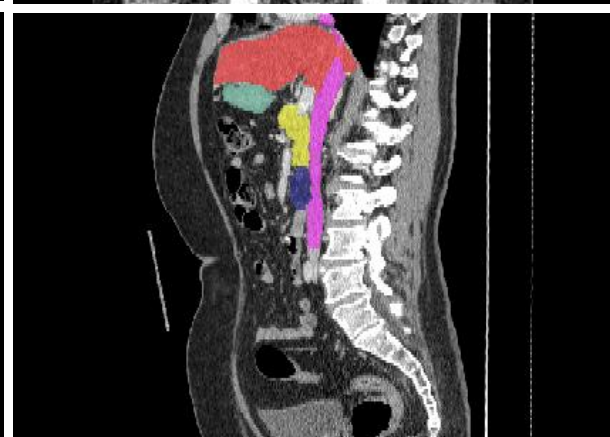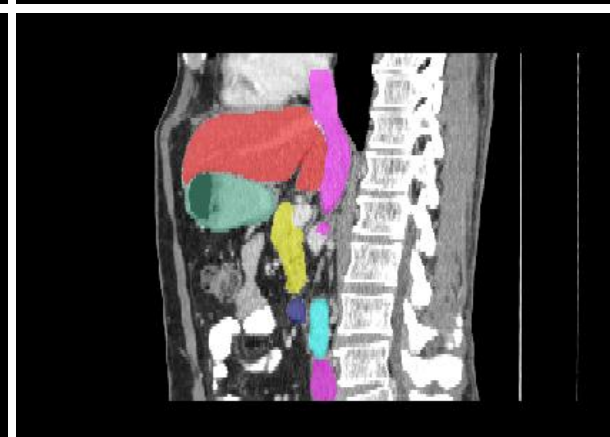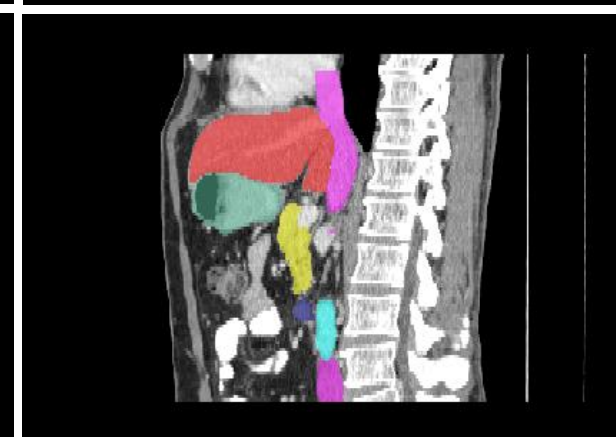

Case55\_Pred

Case55\_GT

Case81\_Pred

Case81\_GT

Supplement: supplementary_material [file attachment]

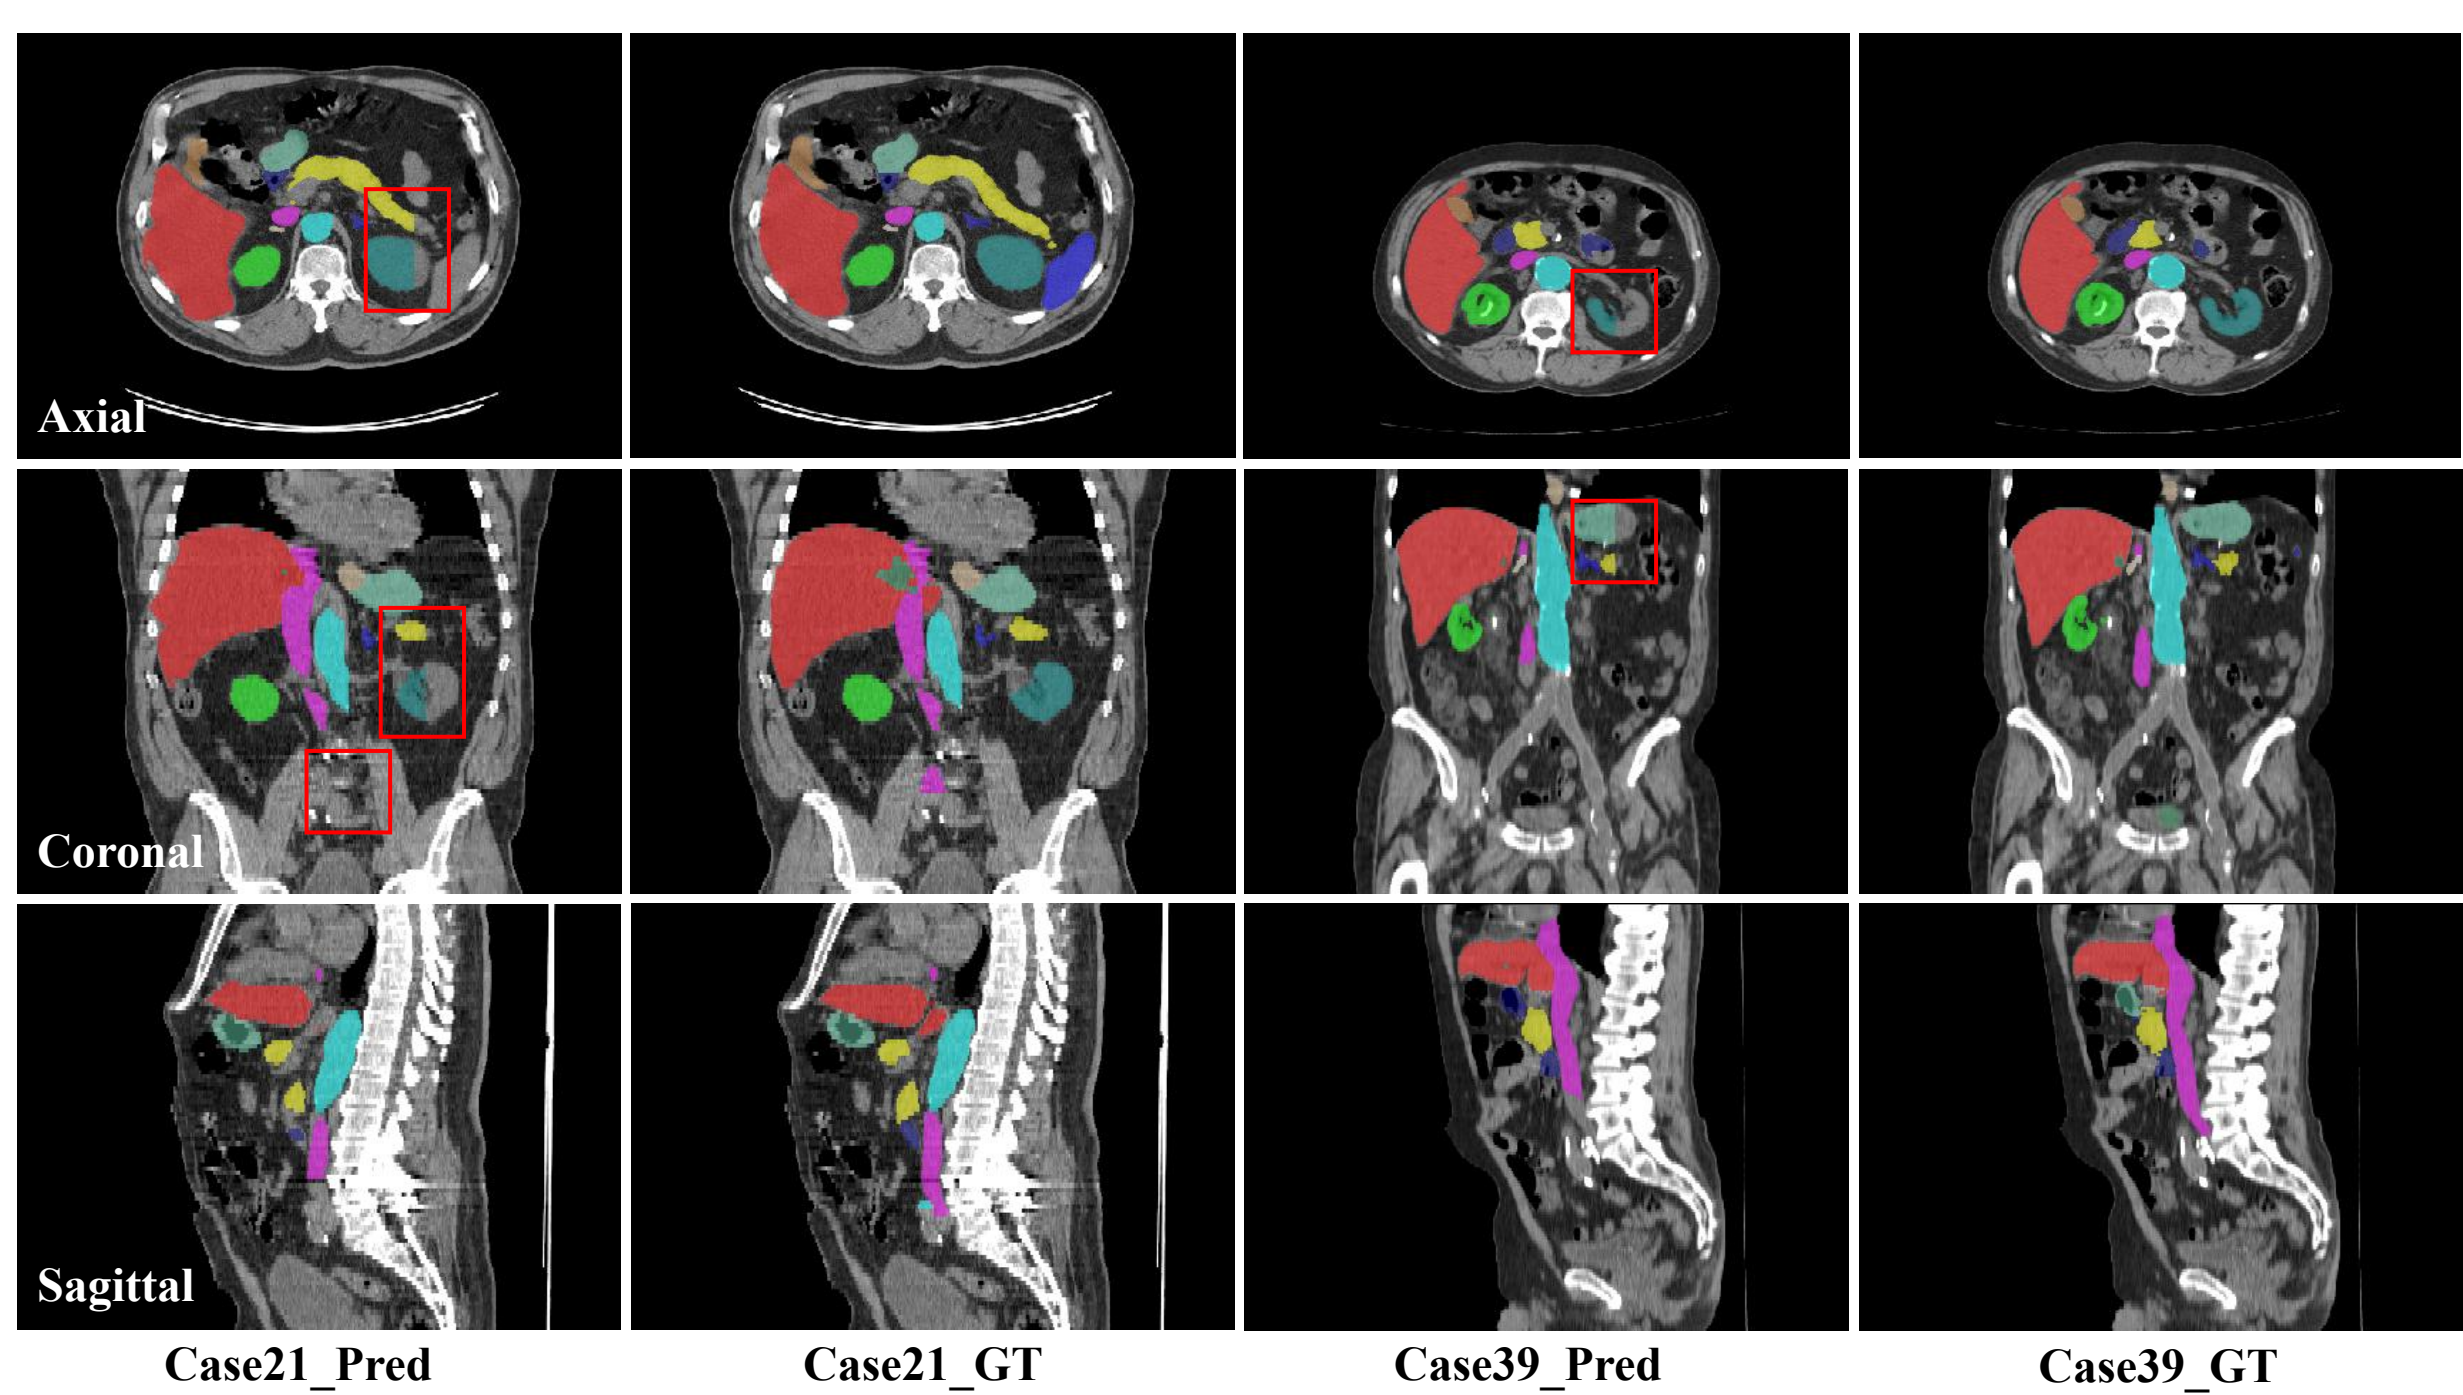

Supplement: supplementary_material [file attachment]

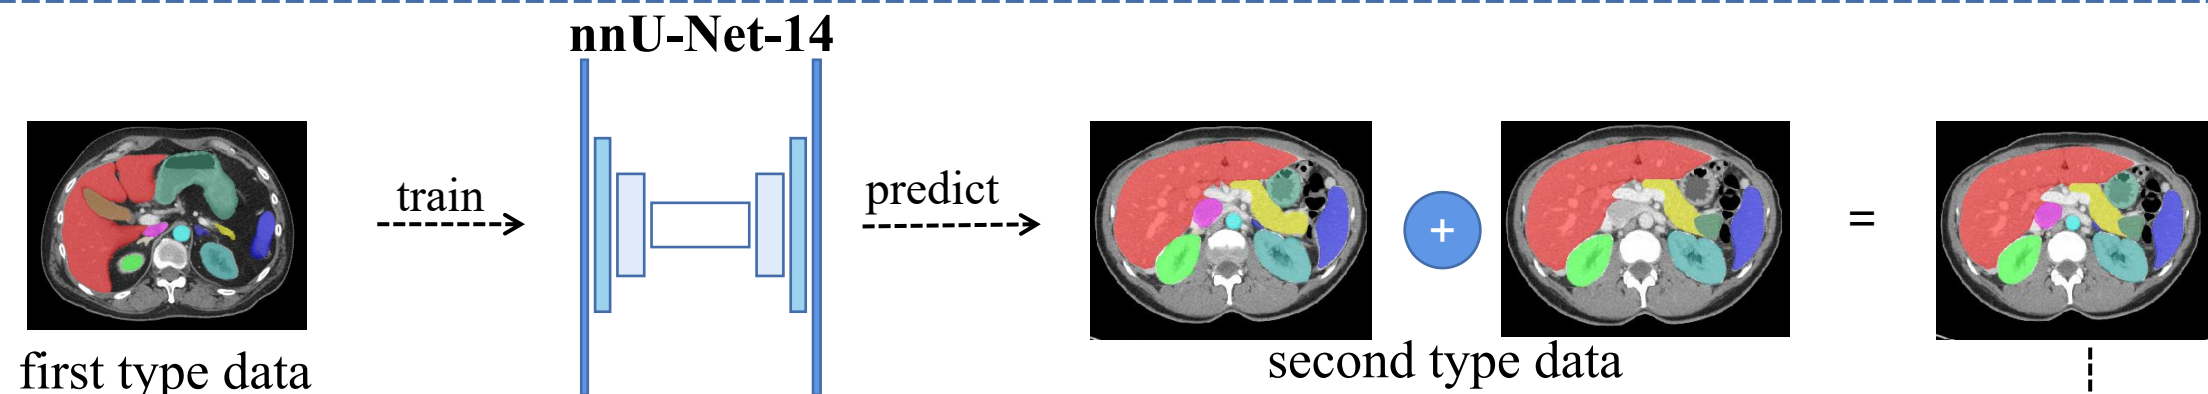

(a) Generation of pseudo labels

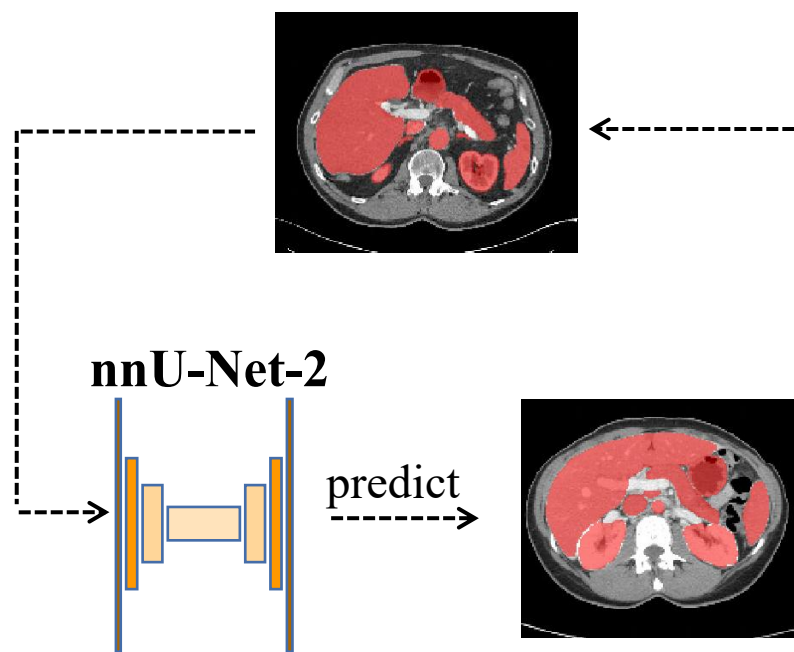

(b) First stage

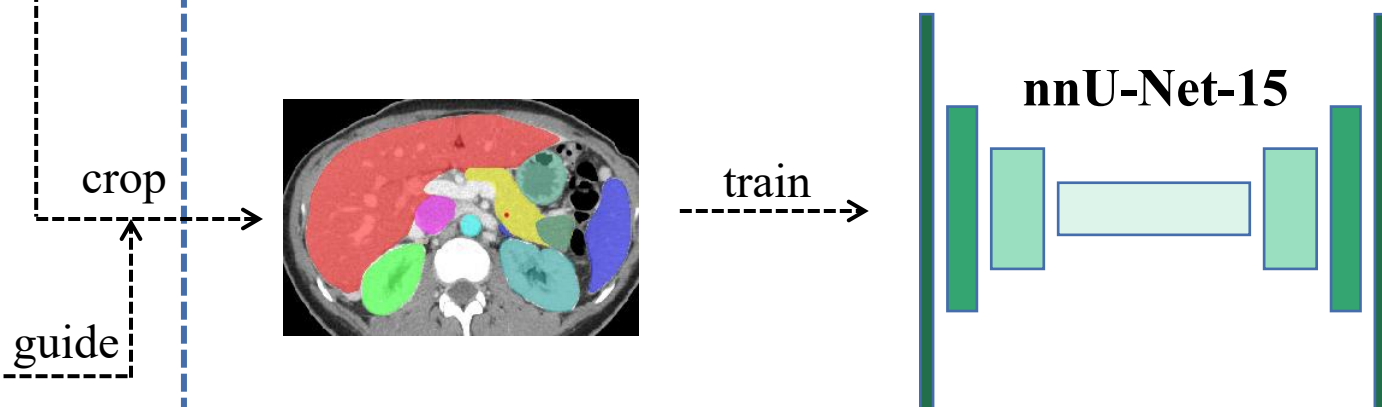

(c) Second stage

Supplement: supplementary_material [file attachment]

Case51

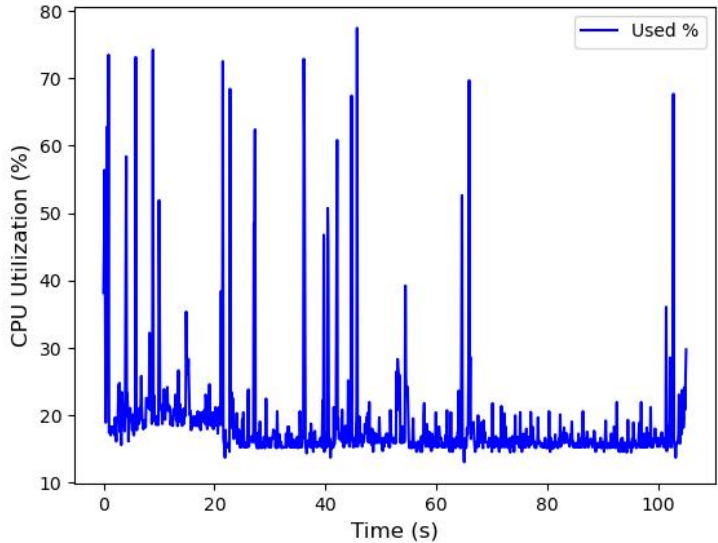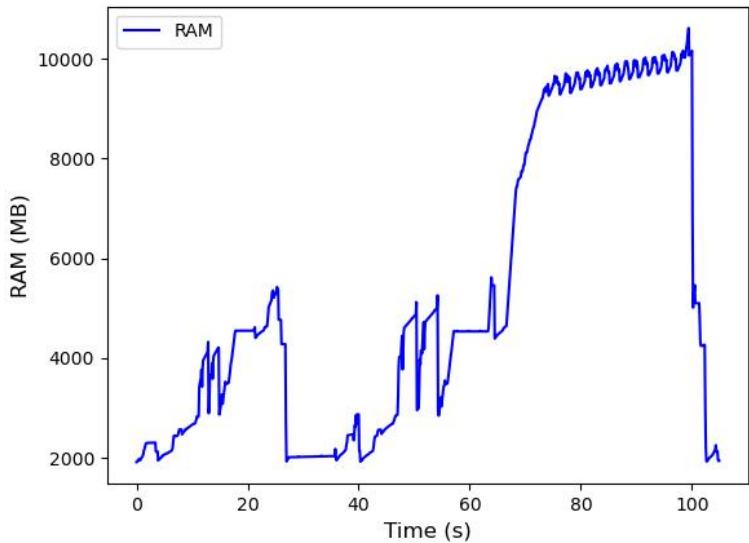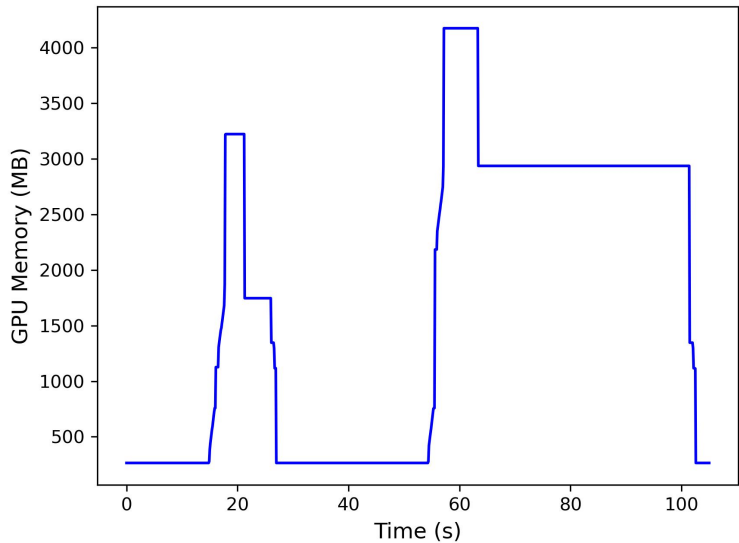

Case99

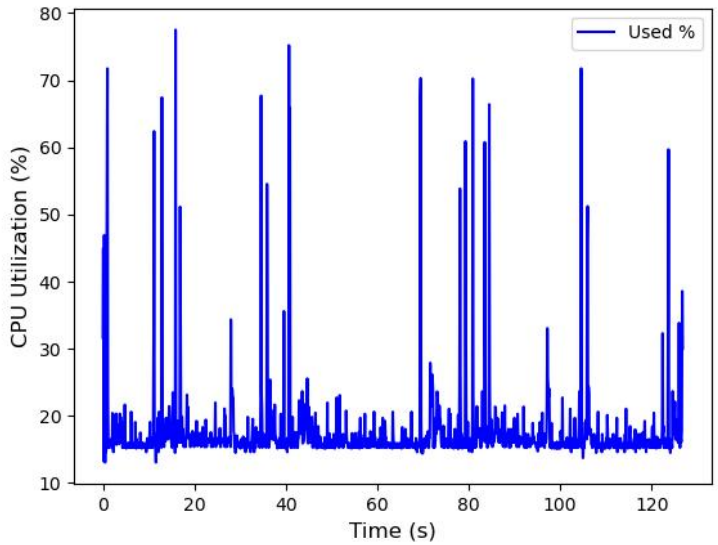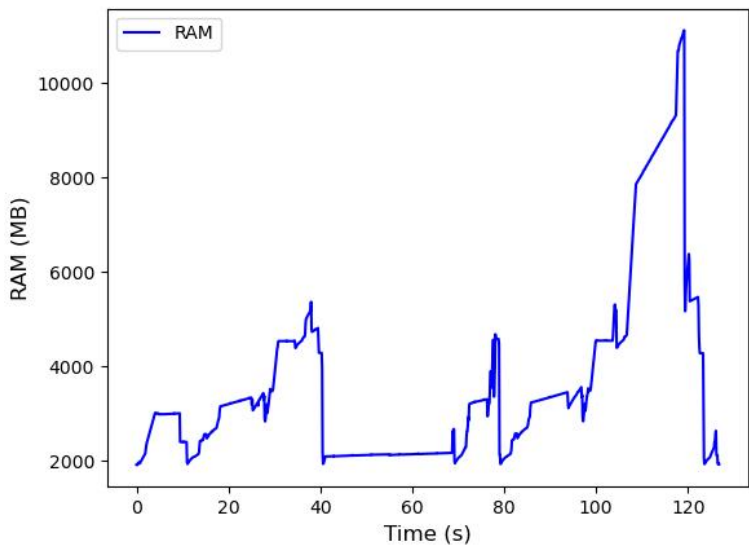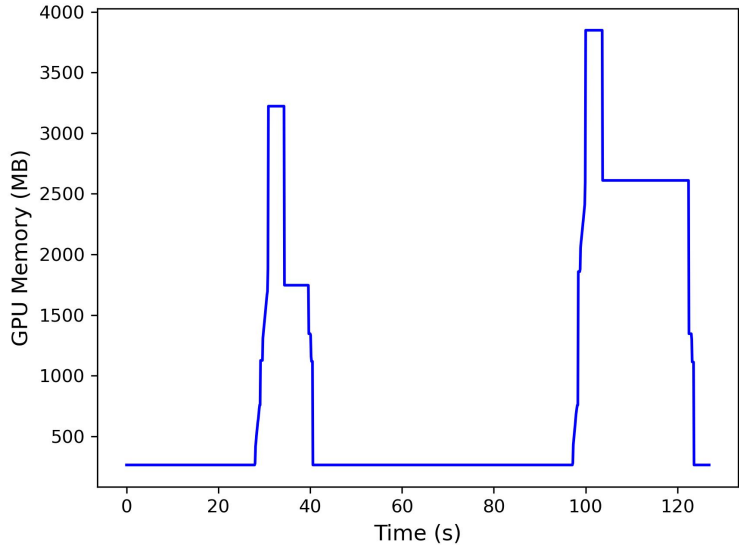

Supplement: supplementary_material [file attachment]
